# **Tumor-bearing mice display reduced insulin-stimulated glucose uptake and microvascular perfusion and exhibit increased hepatic glucose production**

X. Han<sup>a</sup>, S. H. Raun<sup>a</sup>, M. Carlsson<sup>a</sup>, K.A. Sjøberg<sup>a</sup>, C. Henriquez-Olguín<sup>a</sup>, M. Ali<sup>a</sup>, A-M. Lundsgaard<sup>a</sup>, A. M. Fritzen<sup>a</sup>, L. L. V. Møller<sup>a</sup>, Z. Li<sup>a</sup>, J. Li<sup>a</sup>, T. E. Jensen<sup>a</sup>, B. Kiens<sup>a</sup>, and L. Sylow<sup>a\*</sup>

<sup>a</sup> Section of Molecular Physiology, Dept. of Nutrition, Exercise, and Sports, Faculty of Science, University of Copenhagen, Denmark

\* Corresponding author: Lykke Sylow, email: [Lshansen@nexs.ku.dk](mailto:Lshansen@nexs.ku.dk), phone: +45 20955250, Universitetsparken 13, 2100 Copenhagen, Denmark

**Running title:** Molecular causes of insulin resistance in cancer

**Keywords:** Lewis lung carcinoma, insulin resistance, glycaemic regulation, cancer, microvascular perfusion

**Funding.** The study was supported by the Novo Nordisk Foundation (grant NNF16OC0023418 and NNF18OC0032082 to LS) and the China Scholarship Council (CSC) Ph.D. Scholarship to X.H. A.M.F and A-M.L. were supported by a postdoctoral research grant from the Danish Diabetes Academy, funded by the Novo Nordisk Foundation (grant: NNF17SA0031406). A.M.F. was furthermore supported by the Benzon Foundation. L.L.V.M. was supported by a PhD grant from the Lundbeck Foundation. B.K. was supported by The Danish Medical Research Council.

**Word count:** Abstract 249 words, main text 5100 words

**Number of figures:** 7 + 3 supplemental

## Abstract

Cancer is often associated with poor glycemic control. However, the underlying molecular mechanisms are unknown. The aim of this study was to elucidate tissue-specific contributions and molecular mechanisms underlying impaired glycemic regulation in cancer.

Basal and insulin-stimulated glucose uptake in skeletal muscle and white adipose tissue (WAT), as well as hepatic glucose production, were determined in control and Lewis lung carcinoma (LLC) tumor-bearing C57BL/6 mice using isotopic tracers. Muscle microvascular perfusion was analyzed via a real-time contrast-enhanced ultrasound technique. Finally, the role of fatty acid turnover on glycemic control was determined by treating tumor-bearing insulin resistant mice with nicotinic acid or etomoxir.

LLC tumor-bearing mice displayed whole-body insulin resistance and glucose intolerance, which was restored by nicotinic acid or etomoxir. Insulin-stimulated glucose uptake was reduced in muscle and WAT of mice carrying large tumors. Despite compromised muscle glucose uptake, tumor-bearing mice displayed upregulated insulin-stimulated phosphorylation of TBC1D4<sup>Thr642</sup> (+18%), AKT<sup>Ser473</sup> (+65%), and AKT<sup>Thr308</sup> (+86%). Insulin caused a 20% increase in muscle microvascular perfusion in control mice, which was completely abolished in tumor-bearing mice. Additionally, tumor-bearing mice displayed increased (+ 45%) basal (but not insulin-stimulated) hepatic glucose production.

In conclusion, cancer causes significant whole-body insulin resistance, which was restored by inhibition of adipose tissue lipolysis or whole-body fatty acid oxidation. Insulin resistance in tumor-bearing mice was associated with to i) impaired muscle glucose uptake despite augmented insulin signaling and impaired glucose uptake in adipose tissue ii) abrogated muscle microvascular perfusion in response to insulin, and iii) increased basal hepatic glucose production.

## Introduction

Epidemiological and clinical studies show an association between several types of cancers and poor glycemic control in humans. For example, one-third of cancer patients are glucose intolerant (1), which is of clinical relevance as cancer patients with diabetes have higher mortality rates than patients without diabetes (2). Furthermore, recent studies have suggested that insulin resistance could be an underlying cause of cancer-associated loss of muscle and fat mass, coined cachexia (3–5). Cachexia occurs in 60-80% of cancer patients and is associated with poor prognosis (6). However, the mechanistic and molecular cause(s) of insulin resistance in cancer is largely unexplored.

Skeletal muscle and adipose tissue are essential for maintaining whole-body glucose homeostasis by taking up the majority of glucose in response to insulin in healthy humans (7). Insulin promotes glucose disposal in skeletal muscle and adipose tissue by increasing microvascular perfusion as well as mediating glucose transport across the cell membrane (8–10). Previous non-cancer studies found decreased insulin-induced microvascular perfusion and glucose transport under insulin-resistant conditions, like obesity and diabetes (11,12). Whether insulin resistance in cancer is associated with reduced glucose uptake in skeletal muscle and adipose tissue, and whether impaired microvascular perfusion is a potential cause of this have to our knowledge, not previously been determined.

Fatty acid oxidation and/or adipose tissue lipolysis are increased in many cancers (13–15). Interestingly, excessive fatty acids in the circulation can cause insulin resistance and have been suggested as a cause of insulin resistance in obesity and type 2 diabetes (16–18). However, a role for altered fatty acid turnover in cancer-associated impaired glycemic regulation is unexplored. Some literature suggests that excessive fatty acid turnover is a leading cause of cancer cachexia because blockade of fatty acid oxidation or suppression of lipolysis in adipose tissue prevent

cachexia in tumor-bearing mice (19–21). Given the link between insulin resistance and cachexia (3–5), altered fatty acid turnover could be involved in the poor glycemic regulation observed in many cancers.

Thus, circumstantial evidence points towards impaired glycemic regulation in patients with cancer, however, the mechanisms are unclear. Therefore, the aim of the present investigation was to elucidate tissue-specific contributions and molecular mechanisms underlying impaired glycemic regulation in cancer.

Here, we found that cancer caused significant whole-body insulin resistance and glucose intolerance that was restored by blockage of adipose tissue lipolysis or whole-body fatty acid oxidation. Insulin resistance in tumor-bearing mice was, at least partially, ascribed to i) impaired muscle glucose uptake despite augmented insulin signaling and impaired glucose uptake in adipose tissue and ii) abrogated muscle microvascular perfusion in response to insulin.

## Methods

*Cell culture.* Lewis lung carcinoma cells (LLC1, ATCC® CRL1642™) were cultured in DMEM, high glucose (Gibco #41966-029) supplemented with 10% fetal bovine serum (FBS, Sigma #F0804), 1% penicillin-streptomycin (ThermoFisher #15140122) (5% CO<sub>2</sub>, 37 °C). Prior to inoculation into mice, LLC cells were trypsinized and washed twice with PBS. LLC cells were suspended in PBS with a final concentration of  $2.5 \times 10^6$  cells/ul.

*Animals.* Female C57BL/6J (Taconic, DK) mice were acclimatized one week following arrival to the facility and group-housed at ambient temperature (21–23°C) with nesting materials, a 12 h:12 h light-dark cycle, and access to a standard rodent chow diet (Altromin no. 1324, Brogaarden, DK) and water *ad libitum*. At the age of 12–14 weeks, mice were randomly assigned into control (Control) or LLC tumor-bearing (LLC) groups and subcutaneously inoculated with 100µl PBS with

or without  $2.5 \times 10^5$  LLC cells into the right flank. Control and LLC tumor-bearing mice were sacrificed at two time points: 15 days (LLC day15) and 21-27 days (LLC day 21-27) after tumor inoculation. Control mice at both day 15 and day 21-27 were included for analysis. Tumor volume (V) was monitored by caliper measurement and defined by  $V [\text{mm}^3] = (\text{length} [\text{mm}]) \times (\text{width} [\text{mm}])^2 \times 0.52$  every 2 to 5 days (22) and body weight was measured before the start of the intervention and at the day of the terminal experiment (day 15 or day 21-27).

*Etomoxir and nicotinic acid administration.* As mice housed at ambient temperature are mildly cold stressed and preferentially metabolize more lipids than carbohydrate, we reasoned that inhibiting fat metabolism might cause undue metabolic stress at ambient temperature (23) and therefore we performed this part of the experiment at thermoneutrality (30 °C). After 3 weeks of acclimatization and mimicking intraperitoneal (i.p) injection every other day using empty syringes, LLC inoculation was performed as described above. Half of the tumor-bearing mice were intraperitoneally (i.p.) injected daily with 5 mg/kg body weight ethyl-2-[6-(4-chlorophenoxy)hexyl]-oxirane-2-carboxylate (etomoxir) (Sigma-Aldrich, US), an inhibitor of fatty acid oxidation, dissolved in 5% (2-Hydroxypropyl)- $\beta$ -cyclodextrin solution from day 8 following tumor inoculation (LLC-Eto). The other half of tumor-bearing mice (LLC) and non-tumor-bearing control mice (Control) were i.p. injected with 5% (2-Hydroxypropyl)- $\beta$ -cyclodextrin solution. Mice were sacrificed 18 days following tumor inoculation.

The nicotinic acid-administrated mice (LLC-Nico), inhibitor of adipose tissue lipolysis, were maintained and treated similar to etomoxir-administrated mice, with the exception that 50 mg/kg body weight of nicotinic acid (Sigma-Aldrich, US) dissolved in 5% (2-Hydroxypropyl)- $\beta$ -cyclodextrin solution was i.p. injected daily from day 8 following tumor inoculation. All experiments were approved by the Danish Animal Experimental Inspectorate (Licence; 2016-15-0201-01043).

*Glucose tolerance test.* D-Glucose (2 g/kg body weight) was injected i.p. following a 6 h fast from 7:00 AM. Blood glucose levels before (0 minutes), 20 minutes, 40 minutes, 60 minutes and 90 minutes following glucose injection were measured using a glucometer (Bayer Contour, Switzerland). For measurements of plasma insulin concentration, blood was collected from the tail vein at time points 0 and 20 minutes. Plasma insulin was analyzed by ELISA in duplicates (Mouse Ultrasensitive Insulin ELISA, #80-INSTRU-E10, ALPCO Diagnostics, USA).

*Body composition analysis.* Fat mass and lean mass were determined by quantitative magnetic resonance imaging (EchoMRI-4in1TM, Echo Medical System LLC, USA) 0 to 3 days before termination. The dissected tumor mass was subtracted from the fat mass and lean mass, respectively, as 5% of the tumor is reported as “fat mass” and 95% as “lean mass” by the quantitative magnetic resonance imaging of tumor itself (unpublished determinations).

*In vivo 2-deoxy-glucose uptake experiments.* To determine glucose uptake in muscle, perigonadal white adipose tissue (WAT), and the tumor, 2-deoxy-glucose ([3H]2DG) (Perkin Elmer) was injected retro-orbitally (r.o.) in a bolus of saline containing 66.7  $\mu$ Ci/ml [3H]2DG (6  $\mu$ l/g body weight) in mice. The injectate contained 0.3 U/kg body weight insulin (Actrapid; Novo Nordisk, DK) or a comparable volume of saline as well. Mice were fasted for 3-5 h from 07:00 AM and anesthetized (i.p. injection of 7.5mg pentobarbital sodium per 100 g body weight) 15 minutes before r.o. injection. Blood samples were collected from the tail vein immediately prior to insulin or saline injection and after either 5 and 10 minutes, or after 3, 6, 9, and 12 minutes as indicated in the figures and analyzed for glucose concentration using a glucometer (Bayer Contour, Switzerland). After 10 or 12 minutes, perigonadal WAT, tibialis anterior (TA) and gastrocnemius muscles were excised and quickly frozen in liquid nitrogen and stored at  $-80^{\circ}\text{C}$  until processing. Once tissues were removed, blood was collected by punctuation of the heart, centrifuged (13,000 g, 5 minutes) and plasma frozen at  $-80^{\circ}\text{C}$ . Plasma samples were analyzed for insulin concentration and specific

[3H]2DG tracer activity. Plasma insulin was analyzed as described above. Tissue-specific 2DG uptake was analyzed as described (24,25).

Calculations of the whole-body glucose uptake index were performed as follows based on the body mass compositions obtained from the MRI scans:  $y = a \cdot b$ , where  $y$  is 2DG uptake index ( $\mu\text{mol/h}$ ),  $a$  is 2DG uptake rate ( $\mu\text{mol/g/h}$ ),  $b$  is either tumor, fat, or  $0.5 \cdot \text{lean mass}$  (g). Half of the lean mass was estimated to be muscle mass based on the study of Rolfe and Brown (26). It was anticipated that all fat depots displayed glucose uptake similar to our measured WAT depot.

*Microvascular perfusion in muscle.* Mice were anesthetized with an i.p. injection of 11  $\mu\text{l/g}$  body weight of Fentanyl (0.05 mg/ml, Dechra, DK), Midazolam (5 mg/ml, Accord Healthcare, UK) and Acepromazine (10 mg/ml, Pharmaxim, SE), and placed on a heating pad. In control ( $n=6$ ) and large (tumor size  $> 800 \text{ mm}^3$ ) tumor-bearing mice ( $n=6$ ), microvascular perfusion (MVP) was measured across the adductor magnus and semimembranosus muscles, with real-time contrast-enhanced ultrasound technique using a linear- array transducer connected to an ultrasound system (L9-3 transducer, iU22, Philips Ultrasound, Santa Ana, CA, USA) as described (27). In short, a transducer was positioned over the left hindlimb and secured for the course of the experiment. A suspension of Optison microbubbles (Perflutren Protein-Type A Microspheres Injectable Suspension, USP, GE Healthcare, USA) was infused intravenously (15  $\mu\text{l/minute}$ ) using a Harvard 11 Plus low volume infusion pump (Harvard instrument Co., Holliston, MA). The infusion tube was attached to a vortex mixer to ensure a homogeneous microbubble solution entering the animal. An infusion time of 4 minutes was used where the first 2 minutes was to ensure systemic steady-state conditions before three consecutive MVP recordings were performed. Data were exported to quantification software (QLab, Philips, Andover, MA, USA) for analysis. Regions of interest were drawn clear of connective tissue and large vessels and copied into each file to ensure that regions were identical for each recording. Calculations were made in accordance with Wei et al. (28) where acoustic intensity

(AI) versus time curves were fitted to the exponential function:  $y = A(1 - \exp(-\beta(t - Bt)))$ , where  $t$  is time (seconds),  $Bt$  is the time used for background subtraction,  $y$  is the acoustic intensity at any given  $t$ ,  $A$  is the plateau AI defined as MVP, and  $\beta$  is the flow rate constant (liters·s<sup>-1</sup>) that determines the rate of rising AI.

*Basal and insulin-stimulated hepatic glucose production.* Mice (control,  $n=5$ , or large (tumor size > 800 mm<sup>3</sup>) tumor-bearing mice,  $n=6$ ) were clamped in randomized order after a 4 h fasting period from 10:00 AM. Mice were anesthetized with an i.p. injection of 11  $\mu$ l/g body weight of Fentanyl (0.05 mg/ml, Dechra, DK), Midazolam (5 mg/ml, Accord Healthcare, UK) and Acepromazine (10 mg/ml, Pharmaxim, SE), and placed on a heating pad. A polyethylene cannula (PE50, Intramedic, US) was inserted into a jugular vein for administration of anesthetics, insulin, and glucose. Anesthesia was maintained by constant infusion of the anesthetics (0.03  $\mu$ l/g). After surgery, a 60 minutes continuous infusion (0.83  $\mu$ l/minute, 1.2  $\mu$ Ci/h) of D-[3-3H]-glucose (Perkin Elmer) was administrated. Then, a 120 minutes hyperinsulinemic-euglycemic clamp was initiated, with a primed (4.5 mU) infusion of insulin (7.5  $\mu$ U/kg/minute) (Actrapid, Novo Nordisk, DK) and D-[3-3H]-glucose (0.83  $\mu$ l/minute, 1.2  $\mu$ Ci/h). Blood glucose was clamped at 6 mmol/l and maintained by a variable infusion of 20% glucose solution. Blood was sampled from the tail at -10, 0, 105, and 120 minutes for determination of plasma glucose, plasma 3H activity by scintillation counting, and thereby the plasma specific activity. Basal and insulin-stimulated HGP were calculated based on the equation described (29). At 120 minutes, blood for plasma insulin concentration was also obtained from the tail. Mice were euthanized by cervical dislocation.

*Immunoblotting.* Mouse muscles was pulverized in liquid nitrogen and homogenized 2  $\times$  0.5 minutes at 30 Hz using a TissueLyser II bead mill (Qiagen, USA) in ice-cold homogenization buffer, pH 7.5 (10% glycerol, 1% NP-40, 20 mM sodium pyrophosphate, 150 mM NaCl, 50 mM HEPES (pH 7.5), 20 mM  $\beta$ -glycerophosphate, 10 mM NaF, 2 mM phenylmethylsulfonyl fluoride



(PMSF), 1 mM EDTA (pH 8.0), 1 mM EGTA (pH 8.0), 2 mM Na<sub>3</sub>VO<sub>4</sub>, 10 µg/ml leupeptin, 10 µg/ml aprotinin, 3 mM benzamidine). After rotation end-over-end for 30 min at 4°C, supernatants from muscle tissue were collected by centrifugation (10,000 rpm) for 20 minutes at 4°C. Lysate protein concentrations were measured using the bicinchoninic acid method with bovine serum albumin (BSA) as standard (Pierce). Total proteins and phosphorylation levels of relevant proteins were determined by standard immunoblotting techniques loading equal amounts of protein. Polyvinylidene difluoride membranes (Immobilon Transfer Membrane; Millipore) were blocked in Tris-buffered saline (TBS)-Tween 20 containing 3% milk or 5% BSA protein for 10-20 minutes at room temperature. Membranes were incubated with primary antibodies (Table 1) overnight at 4°C, followed by incubation with HRP-conjugated secondary antibody for 45 minutes at room temperature. Coomassie brilliant blue staining was used as a loading control (30). Bands were visualized using the Bio-Rad ChemiDoc MP Imaging System and enhanced chemiluminescence (ECL+; Amersham Biosciences). Bands were quantified using BioRad software.

Table1. Primary antibodies

| Antibody                   | Dilution (Primary)  | Catalogue number | Company                         | RRID       |
|----------------------------|---------------------|------------------|---------------------------------|------------|
| AKT2                       | 1:1000 (in 2% milk) | #3063            | Cell Signaling Technology (CST) | AB_2225186 |
| p-AKT <sup>Ser473</sup>    | 1:1000 (in 2% milk) | #9271            | CST                             | AB_329825  |
| p-AKT <sup>Thr308</sup>    | 1:1000 (in 2% milk) | #9275            | CST                             | AB_329828  |
| TBC1D4                     | 1:1500 (in 2% milk) | ab189890         | Abcam                           | —          |
| p-TBC1D4 <sup>Thr642</sup> | 1:1000 (in 2% milk) | #D27E6           | CST                             | AB_2651042 |
| Hexokinase II              | 1:1000 (in 2% milk) | #2867            | CST                             | AB_2232946 |
| GLUT4                      | 1:1000 (in 2% milk) | #PA1-1065        | Thermo Fisher Scientific        | AB_2191454 |

|       |                          |        |               |           |
|-------|--------------------------|--------|---------------|-----------|
| c-Myc | 1:500 (in 5% goat serum) | #C3956 | Sigma-Aldrich | AB_439680 |
|-------|--------------------------|--------|---------------|-----------|

*Statistical analyses.* Results are shown as mean  $\pm$  standard error (SE) with the individual values shown for bar graphs. Statistical testing was performed using t-test, one-way or two-way (repeated measures when appropriate) ANOVA as applicable. Sidak post hoc test was performed when appropriate. Statistical analyses were performed using GraphPad Prism, version 7 (GraphPad Software, La Jolla, CA, USA, RRID: SCR\_002798). The significance level were set at  $\alpha = 0.05$ .

## Results

### **LLC induced adipose tissue wasting and increased spleen weight, indicative of mild cachexia and inflammation.**

Tumors were palpable on day 6. Lewis lung carcinoma tumor-bearing (LLC) day 15 mice had an average tumor volume of  $530 \text{ mm}^3 \pm 285 \text{ mm}^3$ . LLC day 21-27 mice had an average tumor volume of  $1345 \text{ mm}^3 \pm 946 \text{ mm}^3$  (Fig. 1A). LLC day 21-27 tumor-bearing mice displayed reduced body weight (-5%; Fig. 1B), which was due to adipose tissue loss (Fig. 1C and D) rather than muscle mass loss (Fig. 1E). Spleen weight increased in LLC day 15 (+40%) and LLC day 21-27 (101%) tumor-bearing mice, indicating elevated immunomodulatory activity compared with control mice (Fig. 1F). Thus, LLC induced adipose tissue wasting and increased spleen weight, indicative of mild cachexia and inflammation.

### **LLC tumor-bearing mice displayed insulin resistance**

We next investigated the effect of cancer on whole-body insulin action by retro-orbitally injecting a submaximal dose of insulin (unpublished data and (31)) and analyzing blood glucose in control and

LLC tumor-bearing mice. The experiment overview is shown in Fig. 2A. In contrast to control mice, both LLC day 15 and LLC day 21-27 tumor-bearing mice did not respond to insulin 5 minutes following injection (Fig. 2B). Furthermore, the blood glucose-lowering effect of insulin was markedly reduced (by 2-2.5 mM) at 10 minutes in LLC tumor-bearing mice compared to control mice (Fig. 2B). Accordingly, the area over the curve (AOC) was 60-80% lower in tumor-bearing mice (Fig. 2B), suggesting that LLC causes severe insulin resistance in mice.

Given the reduced whole-body insulin action, we measured glucose uptake in skeletal muscle and WAT, tissues that account for the majority of glucose utilization involved in whole-body glycemic control (32,33). In gastrocnemius muscle, insulin-stimulated glucose uptake was reduced in LLC day 15 tumor-bearing mice (-23%, Fig. 2C) and day 21-27 tumor-bearing mice (-28%, Fig. 2C) compared with control mice. Likewise, in TA muscle, insulin-stimulated glucose uptake was reduced in LLC day 21-27 tumor-bearing mice (-32%, Fig. 2D), but surprisingly, increased in LLC day 15 tumor-bearing mice (+45%, Fig. 2D). Similarly, in WAT, insulin-stimulated glucose uptake tended ( $P=0.0784$ ) to be decreased by LLC at day 21-27 (-37%, Fig. 2E), while being increased in LLC at day 15 (+48%, Fig. 2E). We did not observe any changes in glucose uptake (Fig. 2C-E) or blood glucose (Fig. S1) among saline-treated mice.

### **Insulin-stimulated glucose uptake in skeletal muscle and white adipose tissue negatively correlated with tumor size.**

As tissue-specific insulin resistance was more pronounced at day 21-27 where the tumors were larger compared with day 15, we investigated whether insulin resistance was related to the tumor size. Thus, we re-divided our current data set into small vs large tumors (cut off 800 mm<sup>3</sup>) across the LLC day 15 and LLC day 21-27 groups. In mice with large tumors (LLC-L), the blood glucose-lowering effect of insulin was almost abrogated (Fig. 2F). However, in mice with small tumors

(LLC-S), the blood glucose-lowering effect of insulin was only modestly reduced (Fig. 2F). Accordingly, AOC was 96% reduced in mice with large tumors and tended ( $P=0.051$ ) to be 47% decreased in mice with small tumors (Fig. 2F).

In LLC-S tumor-bearing mice, insulin-stimulated glucose uptake tended ( $P=0.051$ ) to be 19% decreased in gastrocnemius (Fig. 2G), increased in TA (+35%, Fig. 2H), while unaltered in eWAT (Fig. 2I) compared to control mice. In contrast, LLC-L tumor-bearing mice displayed a marked reduction in insulin-stimulated glucose uptake in gastrocnemius (-32%, Fig. 2G), TA (-41%, Fig. 2H), eWAT (-44%, Fig. 2I) was observed.

In addition, a negative correlation between tumor size and insulin-stimulated glucose uptake was observed in both skeletal muscle and white adipose tissue (Fig. 2J). These findings show that cancer can significantly reduce insulin-stimulated glucose uptake in skeletal muscle and white adipose tissue in a tumor size-dependent manner.

Previous studies have reported that tumors take up glucose at a high rate to support tumor growth, migration, and invasion (34,35). However, to the best of our knowledge, no study has to date compared glucose uptake into muscle and tumor in the same mouse. We therefore analyzed tumor glucose uptake and found that tumor glucose uptake per gram tumor mass was 5.9- and 1.7-fold higher in LLC-S and LLC-L, respectively compared with average basal muscle glucose uptake (Fig. 2K). Similar results were obtained in the insulin-stimulated state, where the average muscle glucose uptake was 50% that of glucose uptake in tumors of LLC-S tumor-bearing mice. Insulin-stimulated glucose uptake was similar in the tumor and muscle of LLC-L tumor-bearing mice (Fig. 2K). Those findings suggest that the tumor significantly competes with skeletal muscle for glucose. In order to understand how much the tumor contributed to whole-body glucose disposal during the 10 minutes of stimulations, we produced an index of whole-body glucose disposal in fat, skeletal muscle, and

the tumor. It showed that in cancer, a substantial part of the available glucose is directed from muscle and fat into the tumor (Fig. 2L).

### **Reduced skeletal muscle glucose uptake in tumor-bearing mice was not due to reduced AKT signaling**

We next focused on skeletal muscle, which accounts for the majority of insulin-stimulated glucose disposal (33), and investigated canonical muscle insulin signaling to elucidate the molecular mechanisms underlying LLC-induced muscle insulin resistance. We focused our investigation on mice with tumor size more than 800 mm<sup>3</sup> (average tumor volume 1755 ± 763 mm<sup>3</sup>) as insulin resistance was more pronounced in this group. Even though insulin-stimulated muscle glucose uptake was markedly reduced in these LLC-L tumor-bearing mice, the phosphorylation of AKT<sup>Ser473</sup> (+65%), AKT<sup>Thr308</sup> (+86%) (Fig. 3A and B), and TBC1D4<sup>Thr642</sup> (+18%, Fig. 3C) were upregulated. (representative phospho-blot are shown in Fig. 3D).. Protein expression of AKT2 (Fig. 3E), TBC1D4 (Fig. 3F), glucose transporter 4 (GLUT4) (Fig. 3G), and Hexokinase II (Fig. 3H) remained unaltered in tumor-bearing mice (representative blots of total proteins are shown in Fig. 3I).

These findings suggest that reduced insulin-stimulated muscle glucose uptake in tumor-bearing mice is not due to decreased myocellular canonical insulin signaling, on the contrary, we observed augmented phosphorylation of both AKT and TBC1D4.

### **Tumor-bearing mice displayed abrogated muscle microvascular perfusion in response to insulin**

Muscle microvascular perfusion (MVP) is essential for insulin to fully stimulate glucose uptake in muscle, however, it is unknown whether cancer influences muscle MVP. Thus, we determined

muscle MVP in mice with tumor size more than 800 mm<sup>3</sup> (LLC-L, averaged tumor volume 1283 ± 207 mm<sup>3</sup>) in a sub-experiment. In control mice, insulin increased muscle MVP (+70%; Fig. 4A and B) in accordance with previous studies (36,37). Remarkably, this increase was completely abrogated in LLC-L tumor-bearing mice (Fig. 4C and D), showing that cancer negatively affect insulin-stimulated muscle microvascular perfusion, which could contribute to muscle insulin resistance.

### **Tumor-bearing mice exhibit increased basal hepatic glucose production**

Increased hepatic glucose production (HGP) is another hallmark of insulin resistance. Therefore, we measured basal and insulin-stimulated HGP in mice with tumor size of more than 800 mm<sup>3</sup> (LLC-L, averaged tumor volume 3916 ± 2196 mm<sup>3</sup>) in a sub-experiment. Following 120 minutes of continuous insulin infusion (7.5 µU/kg/minute), blood glucose in both control and LLC-L tumor-bearing mice was maintained at a steady level (6 mmol/L) (Fig. 5A). Steady-state glucose infusion rate (GIR) during the clamp was similar between control and tumor-bearing mice (Fig. 5B). This is in contrast to our findings during the 10 minutes r.o. insulin stimulation where tumor-bearing mice displayed reduced insulin response on blood glucose levels. This discrepancy might reflect the fact that the tumor takes up a large proportion of the glucose in the tumor-bearing mice as indicated by Fig. 2K and L that over time during the clamp masks any smaller reductions in muscle and adipose tissue glucose uptake, or that the insulin dose used to estimate GIR was higher compared with the r.o. stimulation.

Interestingly, basal HGP of LLC-L tumor-bearing mice increased by 45% compared to control mice (Fig. 5C). In addition, basal HGP positively correlated with tumor volume (Fig. 5D). At a supra-physiological insulin dose, insulin suppressed HGP similarly in LLC-L tumor-bearing and control mice (Fig. 5C). Nevertheless, within the tumor-bearing group, the inhibitory effect of insulin on

HGP was negatively correlated with tumor volume (Fig. 5E), although this should be interpreted cautiously, given the low number of mice. Collectively, these findings show that cancer increases basal HGP, but does not affect insulin-stimulated GIR or insulin-suppressed HGP at supra-physiological insulin levels.

### **Inhibition of fatty acid oxidation or lipolysis partially restored LLC-induced insulin resistance**

Augmented fatty acid metabolism, a hallmark of many insulin resistance conditions (16,38,39), has been reported in human (40) and murine (19,20) cancer models. Therefore, we tested the hypothesis that cancer might reduce insulin action via its effect on fatty acid metabolism in an experiment set with LLC tumor-bearing mice (averaged tumor volume  $645 \pm 386 \text{ mm}^3$ ). In agreement with previous reports in cancer patients (13–15) and mouse cancer models (19,20), we observed increased plasma triacylglycerol (+23%, Fig. 6A), FFA (+125%, Fig. 6B) and glycerol (+40%, Fig. 6C) concentrations in LLC tumor-bearing compared to control mice. Daily administration of a CPT1 inhibitor, etomoxir, showed that inhibition of fatty acid oxidation restored blood fatty acid concentrations to levels of control mice (Fig. 6A-C). It suggests that inhibition of fatty acid oxidation at least partially corrects abnormal lipid metabolism induced by cancer in mice. Next, we treated mice with insulin to determine insulin's blood glucose-lowering effect. In control mice, insulin lowered blood glucose by 2 mM and 4 mM following 5 and 10 minutes' stimulation, respectively (Fig. 6D). In agreement with our previous observations in the present study, insulin action in LLC tumor-bearing mice was abrogated (Fig. 6D). Remarkably, inhibited fatty acid oxidation, obtained by etomoxir administration, completely rescued insulin action in LLC tumor-bearing mice evidenced by restored blood glucose levels (Fig. 6D) and 2.5-fold increase of AOC (Fig. 6E). We also analyzed plasma insulin concentration 10 minutes following the r.o. insulin

injection, as a marker of insulin clearance. Interestingly, LLC tumor-bearing mice showed increased plasma insulin (+237%) (Fig. 6F), an indication of reduced insulin clearance, which is also observed in diet-induced insulin resistant mice (41,42). Etomoxir administration normalized plasma insulin levels in LLC tumor-bearing mice (Fig. 6F). In order to evaluate glycemic regulation, we undertook a glucose tolerance test and found that tumor-bearing mice were glucose intolerant. Glucose intolerance was not significantly rescued by etomoxir (Fig. 6G+H), despite the improvements in circulating fatty acid levels and insulin action. The glucose challenge increased plasma insulin levels 100-150% similarly in all groups (Fig. S2A). Tumor volume was not affected by etomoxir treatment (Fig. S2B). Spleen weight increased similarly in tumor-bearing mice with or without etomoxir treatment (Fig. S2C).

We next blocked lipolysis by a potent inhibitor, nicotinic acid. In contrast to etomoxir, nicotinic acid restored glucose intolerance in LLC-tumor-bearing mice (Fig. 7A+B). The glucose challenge increased plasma insulin levels similarly (100-150%) in all groups (Fig. 7C), suggesting that altered insulin sensitivity rather than insulin secretion caused the improvement in glucose tolerance by nicotinic acid. However, the blood glucose response to r.o. injected insulin was not improved by nicotinic acid (Fig. S3A+B). Tumor size and tumor growth rate were not affected by nicotinic acid treatment (Fig. S3C). Spleen weight increased similarly in tumor-bearing mice with or without nicotinic acid treatment (Fig. S3D), suggesting that nicotinic acid did not prevent cancer-induced inflammation. Taken together, these findings demonstrate that altered fatty acid metabolism could be an underlying mechanism for LLC-induced insulin resistance.

## Discussion

We show that cancer can result in marked perturbations on at least five metabolically essential functions; i) insulin's blood glucose-lowering effect, ii) glucose tolerance, ii) skeletal muscle and



white adipose tissue insulin-stimulated glucose uptake, iv) muscle microvascular perfusion, and v) basal hepatic glucose production in mice. Additionally, we show that the mechanism causing cancer-induced insulin resistance may relate to increased fatty acid oxidation or increased fatty acid availability.

A major finding in the current study was the significantly impaired insulin-stimulated glucose uptake in both skeletal muscle and white adipose tissue in LLC tumor-bearing mice. Those findings suggest that skeletal muscle and adipose tissue are major players in dysregulated glucose metabolism often observed in human cancers and murine cancer models (43–45). Furthermore, whole-body insulin resistance was observed prior to the loss in body mass, which supports the hypothesis that insulin resistance could cause cancer-associated cachexia, rather than vice versa (3–5). Tumor size seemed to be a key factor in peripheral insulin resistance, as we observed skeletal muscle and white adipose tissue glucose uptake to be negatively correlated with tumor size. Interestingly, the decreased insulin-stimulated glucose uptake in mice with large tumors was not due to diminished insulin signaling in muscle. On the contrary, insulin-stimulated AKT/TBC1D4 signaling was upregulated in the muscle of tumor-bearing mice. This is surprising, given that tumor-bearing mice displayed increased whole body inflammation as indicated by increased spleen volume. Inflammation would be expected to reduce insulin signaling in muscle (46). Tumorkines, such as VEGF and HIF-1, are reported to be upregulated in the LLC model of cancer (47,48) and those tumorkines have been found to increase PI3K/AKT signaling in cancer cells (35,49). Although circulating tumorkines were not analyzed in our study, we speculate that PI3K/AKT-activating tumorkines could cause increased insulin signaling in muscle. Another explanation for increased insulin-stimulated AKT/TBC1D4 signaling could be the observation that tumor-bearing mice had reduced insulin clearance, thus having slightly higher plasma insulin when the tissues were harvested. The causes of upregulated muscle insulin signaling in cancer warrants further

investigation but increased insulin signaling in muscles with reduced insulin-stimulated glucose uptake has been reported in other models (50). Nevertheless, the mechanisms by which cancer causes insulin resistance seems to be different from the mechanisms causing insulin resistance in for example obesity and type 2 diabetes, where muscle AKT and TBC1D4 signaling is either unaffected (51,52) or reduced (53–55).

Another major finding of the present investigation was that insulin-stimulated muscle microvascular perfusion was abrogated in tumor-bearing mice. To our knowledge, it is the first time to describe that dysregulated muscle microvascular perfusion is involved in a common model of cancer and cachexia. Insulin-stimulated microvascular perfusion in muscle is a critical facet in glucose uptake regulation (8,37,56–58), and dysregulation here could thus contribute to the impaired peripheral insulin action observed in our study. In agreement, genetic or pharmacological inhibition of microvascular perfusion impaired insulin-stimulated muscle glucose uptake by 40% in otherwise healthy mice (36). In addition, insulin-stimulated microvascular perfusion is reduced in different insulin resistant conditions, including obesity and diabetes (11,12). In cancer, accelerated adipose tissue lipolysis leading to higher circulating fatty acid levels has been observed in mice and humans (19). This might cause the impaired muscle microvascular perfusion, as experimentally elevated circulating fatty acids reduces insulin-stimulated muscle microvascular perfusion by 40% (59,60) without causing impairments in intracellular insulin signaling in humans (17). Our findings show that decreased microvascular perfusion could contribute to cancer-induced impaired muscle glucose uptake in response to insulin.

In our study, a reduction in skeletal muscle and white adipose tissue glucose uptake likely contributed to the attenuated blood glucose-lowering effect of insulin in tumor-bearing mice. On the other hand, Lang et al (61) have previously reported that insulin resistance in tumor-bearing rats was due to an impaired ability of insulin to suppress hepatic glucose production, although that study

did not analyze muscle and adipose tissue glucose uptake. In the present study, insulin's inhibitory effect on hepatic glucose production was not impaired but we observed a significantly elevated basal hepatic glucose production. Increased basal hepatic glucose production has also been reported in patients with cancer (62). Based on our findings, future work should investigate the mechanism by which cancer, or the metabolic imprint of cancer, influences basal hepatic glucose production. Elevation of fatty acids is often associated with insulin resistance (16–18) and increased plasma fatty acid concentrations are reported in cancers (19,20,44,63). For example, the release of fatty acids and glycerol from WAT explants was 30-40% increased in LLC or B16 tumor-bearing mice (19). Increased circulating fatty acids have been shown to induce insulin resistance (64) and we therefore tested if altered fatty acid turnover mechanistically contributed to cancer-related insulin resistance. In agreement, whole-body insulin action was restored by blocking fatty acid oxidation via etomoxir administration in tumor-bearing mice. Furthermore, lipolysis inhibition via nicotinic acid administration rescued glucose intolerance in tumor-bearing mice. Interestingly, etomoxir normalized plasma triacylglycerol, fatty acids, and glycerol concentrations in tumor-bearing mice, which could benefit insulin action. The fatty acid lowering effect of etomoxir is somewhat surprising, as fatty acid oxidation blockade would be expected to increase circulating levels of fatty acids, as has also been reported in non-tumor-bearing rodents treated with etomoxir at doses higher (65,66) than in the present investigation. However, etomoxir inhibits lipolysis in adipocytes and can increase re-esterification of fatty acids to triacylglycerol in the liver, thereby diminishing release of fatty acids from the adipose tissue and triacylglycerol from the liver (67). In the cancer condition with accelerated lipolysis (13,15), it is possible that etomoxir's effect on triacylglycerol metabolism seen in liver and lipolysis overrules the contrary effect of etomoxir on reduced fatty acid oxidation. Etomoxir has also been reported to reduce inflammation (68,69), which could also contribute to the amelioration of cancer-induced insulin resistance. However, spleen weight

increased similarly in tumor-bearing mice with or without etomoxir treatment, suggesting that etomoxir did not prevent cancer-induced inflammation. Indeed, our results strongly indicate that the impact of cancer on lipid metabolism exerts a critical impact on the pathology of cancer-induced insulin resistance. However, the mechanism by which etomoxir and nicotinic acid restored insulin action was not determined by our study and should be the topic for future investigations.

Based on the present investigation, we propose a model where the tumor secretes tumorkines that increase fatty acid metabolism, which in turn leads to peripheral insulin resistance. Redirecting glucose from skeletal muscle and adipose tissue, likely benefits the tumor's energy demand to support tumor growth, migration, and invasion (34). The clinical relevance of this is suggested, as cancer patients with diabetes have higher mortality rates than patients without diabetes (2).

In conclusion, cancer impaired the blood glucose-lowering effect of insulin, caused glucose intolerance, and reduced glucose uptake in muscle and white adipose tissue. Furthermore, tumor-bearing mice displayed increased basal hepatic glucose production. Cancer-associated insulin resistance was not due to impaired muscle insulin signaling, but was associated with a complete abrogation of insulin-stimulated muscle microvascular perfusion. Finally, we identify fatty acid metabolism as a major player in cancer-associated insulin resistance, providing potential therapeutic targets for cancer-induced insulin resistance. These findings suggest that insulin resistance is likely of key importance in the therapy of cancer and cachexia.

**Acknowledgments.** We acknowledge the skilled technical assistance of Betina Bolmgren and Irene Bech Nielsen (Molecular Physiology Group, Department of Nutrition, Exercise and Sports, University of Copenhagen, Denmark).

# References

1. Tayek JA. A review of cancer cachexia and abnormal glucose metabolism in humans with cancer. *J Am Coll Nutr.* 1992;11(4):445–56.
2. Ranc K, Jorgensen ME, Friis S, Carstensen B. Mortality after cancer among patients with diabetes mellitus: effect of diabetes duration and treatment. *Diabetologia.* 2014 May;57(5):927–34.
3. Wagner E, Petruzzelli M. Cancer metabolism: A waste of insulin interference. *Nature.* 2015;510:7–8.
4. Figueroa-Clarevega A, Bilder D. Malignant drosophila tumors interrupt insulin signaling to induce cachexia-like wasting. *Dev Cell.* 2015;33(1):47–55.
5. Kwon Y, Song W, Droujinine IA, Hu Y, Asara JM, Perrimon N. Systemic organ wasting induced by localized expression of the secreted Insulin/IGF antagonist ImpL2. *Dev Cell.* 2015;33(1):36–46.
6. Baracos VE, Martin L, Korc M, Guttridge DC, Fearon KCH. Cancer-associated cachexia. Vol. 4, *Nature Reviews Disease Primers.* 2018.
7. DeFronzo RA, Tripathy D. Skeletal muscle insulin resistance is the primary defect in type 2 diabetes. *Diabetes Care.* 2009 Nov;32 Suppl 2:S157–63.
8. Meijer RI, De Boer MP, Groen MR, Eringa EC, Rattigan S, Barrett EJ, et al. Insulin-Induced Microvascular Recruitment in Skin and Muscle are Related and Both are Associated with Whole-Body Glucose Uptake. *Microcirculation.* 2012;19(6):494–500.
9. Keske MA, Premilovac D, Bradley EA, Dwyer RM, Richards SM, Rattigan S. Muscle microvascular blood flow responses in insulin resistance and ageing. *J Physiol.* 2016;594(8):2223–31.
10. Świdarska E, Strycharz J, Wróblewski A, Szemraj J, Drzewoski J, Śliwińska A. Role of PI3K/AKT Pathway in Insulin-Mediated Glucose Uptake. In: *Glucose transport.* 2018. p. 1–18.
11. Kolka CM. The Skeletal Muscle Microvasculature and Its Effects on Metabolism. In: *From molecules to clinical practice.* 2016. p. 50–79.
12. Keske MA, Clerk LH, Price WJ, Jahn LA, Barrett EJ. Obesity Blunts Microvascular Recruitment in Human Forearm Muscle After a Mixed Meal. *Diabetes Care.* 2009;32(9):1672–7.
13. Balaban S, Shearer RF, Lee LS, van Geldermalsen M, Schreuder M, Shtein HC, et al. Adipocyte lipolysis links obesity to breast cancer growth: adipocyte-derived fatty acids drive breast cancer cell proliferation and migration. *Cancer Metab.* 2017;5(1):1–14.
14. Qu Q, Zeng F, Liu X, Wang QJ, Deng F. Fatty acid oxidation and carnitine palmitoyltransferase I: Emerging therapeutic targets in cancer. *Cell Death Dis.* 2016;7(5):1–9.
15. Agustsson T, Rydén M, Hoffstedt J, Van Harmelen V, Dicker A, Laurencikienė J, et al. Mechanism of increased lipolysis in cancer cachexia. *Cancer Res.* 2007;67(11):5531–7.
16. Abel ED. Free fatty acid oxidation in insulin resistance and obesity. *Hear Metab.* 2010;1(48):5–10.
17. Hoeg LD, Sjöberg KA, Jeppesen J, Jensen TE, Frosig C, Birk JB, et al. Lipid-induced insulin resistance affects women less than men and is not accompanied by inflammation or impaired proximal insulin signaling. *Diabetes.* 2011 Jan;60(1):64–73.
18. Reaven GM, Hollenbeck C, Jeng CY, Wu MS, Chen YD. Measurement of plasma glucose, free fatty acid, lactate, and insulin for 24 h in patients with NIDDM. *Diabetes.* 1988 Aug;37(8):1020–4.
19. Das SK, Eder S, Schauer S, Diwoky C, Temmel H, Guertl B, et al. Adipose triglyceride lipase contributes to cancer-associated cachexia. *Science (80- ).* 2011;333(6039):233–8.
20. Fukawa T, Yan-Jiang BC, Min-Wen JC, Jun-Hao ET, Huang D, Qian CN, et al. Excessive fatty acid oxidation induces muscle atrophy in cancer cachexia. *Nat Med.* 2016;22(6):666–71.
21. Schönke M, Massart J, Zierath JR. Effects of high-fat diet and AMP-activated protein kinase modulation on the regulation of whole-body lipid metabolism. *J Lipid Res.* 2018;59(7):1276–82.
22. Zhang P, Wang B, Chen X, Cvetkovic D, Chen L, Lang J, et al. Local tumor control and normal tissue toxicity of pulsed low-dose rate radiotherapy for recurrent lung cancer: An in vivo animal study. *Dose-Response.* 2015;13(2):1–9.
23. David JM, Chatziioannou AF, Taschereau R, Wang H, Stout DB. The hidden cost of housing practices: using noninvasive imaging to quantify the metabolic demands of chronic cold stress of laboratory mice. *Comp Med.* 2013 Oct;63(5):386–91.
24. Fueger PT, Hess HS, Posey KA, Bracy DP, Pencek RR, Charron MJ, et al. Control of exercise-stimulated muscle glucose uptake by GLUT4 is dependent on glucose phosphorylation capacity in the conscious mouse. *J Biol Chem.* 2004;279(49):50956–61.
25. Sylow L, Nielsen IL, Kleinert M, Möller LL V., Ploug T, Schjerling P, et al. Rac1 governs exercise-stimulated glucose uptake in skeletal muscle through regulation of GLUT4 translocation in mice. *J Physiol.* 2016 Sep;594(17):4997–5008.
26. Rolfe DF, Brown GC. Cellular energy utilization and molecular origin of standard metabolic rate in mammals. *Physiol Rev.* 2017;77(3):731–58.
27. Sjöberg KA, Rattigan S, Hiscock N, Richter EA, Kiens B. A new method to study changes in microvascular blood volume in muscle and adipose tissue: real-time imaging in humans and rat. *Am J Physiol Circ Physiol.* 2011;301(2):H450–8.
28. Wei K, Jayaweera AR, Firoozan S, Linka A, Skyba DM, Kaul S. Quantification of myocardial blood flow with ultrasound-induced destruction of microbubbles administered as a constant venous infusion. *Circulation.* 1998;97(5):473–83.
29. Kim JK. Hyperinsulinemic-euglycemic clamp to assess insulin sensitivity in vivo. Vol. 560, *Methods in Molecular Biology.* 2009. 221–238 p.
30. Welinder C, Ekblad L. Coomassie staining as loading control in Western blot analysis. *J Proteome Res.* 2011;10(3):1416–9.
31. Dalbram E, Basse AL, Zierath JR, Treebak JT. Voluntary wheel running in the late dark phase ameliorates diet-induced obesity in mice without altering insulin action. *J Appl Physiol.* 2019 Apr;126(4):993–1005.
32. Jaggi R, Jiang J, Momoh AO, Alderman A, Giordano SH, Buchholz TA, et al. HHS Public Access. 2017;263(2):219–27.
33. Kumar N, Shaw P, Razzokov J, Yusupov M, Attri P, Uhm HS, et al. Enhancement of cellular glucose uptake by reactive species: A promising approach for diabetes therapy. *RSC Adv.* 2018;8(18):9887–94.
34. Hamanaka RB, Chandel NS. Targeting glucose metabolism for cancer therapy: Figure 1. *J Exp Med.* 2012;209(2):211–5.
35. Ancy PB, Contat C, Meylan E. Glucose transporters in cancer – from tumor cells to the tumor microenvironment. *FEBS J.* 2018;285(16):2926–43.
36. Bonner JS, Lantier L, Hasenour CM, James FD, Bracy DP, Wasserman DH. Muscle-specific vascular endothelial growth factor deletion induces muscle capillary rarefaction creating muscle insulin resistance. *Diabetes.* 2013;62(2):572–80.
37. Wang H, Eggleston EM, Liu Z, Barrett EJ, Chai W, Li G, et al. The vascular actions of insulin control its delivery to muscle and regulate the rate-limiting step in skeletal muscle insulin action. *Diabetologia.* 2009;52(5):752–64.
38. Perry RJ, Camporez JPG, Kursawe R, Titchenell PM, Zhang D, Perry CJ, et al. Hepatic acetyl CoA links adipose tissue inflammation to hepatic insulin resistance and type 2 diabetes. *Cell.* 2015;160(4):745–58.
39. Watt MJ, Steinberg GR. Pathways involved in lipid-induced insulin resistance in obesity. *Future Lipidol.* 2007;2(6):659–67.
40. Magkos F, Fabbrini E, Conte C, Patterson BW, Klein S. Relationship between adipose tissue lipolytic activity and skeletal muscle insulin

- resistance in nondiabetic women. *J Clin Endocrinol Metab.* 2012;97(7):1219–23.
41. Raun SHSH, Ali M, Kjøbsted R, Møller LLLV V., Federspiel MAMA, Richter EAEA, et al. Rac1 muscle knockout exacerbates the detrimental effect of high-fat diet on insulin-stimulated muscle glucose uptake independently of Akt. 2018 Jun;596(12):2283–99.
42. Kurauti MA, Costa-Júnior JM, Ferreira SM, dos Santos GJ, Protzek AOP, Nardelli TR, et al. Acute exercise restores insulin clearance in diet-induced obese mice. *J Endocrinol.* 2016;229(3):221–32.
43. Peres SB, McDonald ME, Alcantara PSM, Seelaender M, Olivan M, Farmer SR, et al. Adipose tissue inflammation and cancer cachexia: Possible role of nuclear transcription factors. *Cytokine.* 2011;57(1):9–16.
44. Arner P. Lipases in cachexia. *Science* (80- ). 2011;333(6039):163–4.
45. Honors MA, Kinzig KP. The role of insulin resistance in the development of muscle wasting during cancer cachexia. *J Cachexia Sarcopenia Muscle.* 2012;3(1):5–11.
46. Fazakerley DJ, Krycer JR, Kearney AL, Hocking SL, James DE. Muscle and adipose tissue insulin resistance: malady without mechanism? *J Lipid Res.* 2018 Jul;
47. Mulligan JK, Rosenzweig SA, Young MRI. Tumor secretion of VEGF induces endothelial cells to suppress T cell functions through the production of PGE2. *J Immunother.* 2010;33(2):126–35.
48. Colegio OR, Chu N-Q, Szabo AL, Chu T, Rhebergen AM, Jairam V, et al. Functional polarization of tumour-associated macrophages by tumour-derived lactic acid. *Nature.* 2014 Sep;513(7519):559–63.
49. Adekolan K, Rosen ST, Shanmugam M. Glucose transporters in cancer metabolism. *Curr Opin Oncol.* 2012;24(6):650–4.
50. Li Z, Naslund-Koch L, Henriquez-Olguin C, Knudsen JR, Li J, Madsen AB, et al. Chemical denervation using botulinum toxin increases Akt expression and reduces submaximal insulin-stimulated glucose transport in mouse muscle. *Cell Signal.* 2019 Jan;53:224–33.
51. Timmers S, de Vogel-van den Bosch J, Towler MC, Schaart G, Moonen-Kornips E, Mensink RP, et al. Prevention of high-fat diet-induced muscular lipid accumulation in rats by alpha lipoic acid is not mediated by AMPK activation. *J Lipid Res.* 2010 Feb;51(2):352–9.
52. Kim YB, Nikoulina SE, Ciaraldi TP, Henry RR, Kahn BB. Normal insulin-dependent activation of Akt/protein kinase B, with diminished activation of phosphoinositide 3-kinase, in muscle in type 2 diabetes. *J Clin Invest.* 1999;104(6):733–41.
53. Shao J, Yamashita H, Qiao L, Friedman J. Decreased Akt kinase activity and insulin resistance C57BL/KsJ-Lepr(db/db) mice. *J Endocrinol.* 2000;167(1):107–15.
54. Huang X, Liu G, Guo J, Su ZQ. The PI3K/AKT pathway in obesity and type 2 diabetes. *Int J Biol Sci.* 2018;14(11):1483–96.
55. Karlsson HKR, Zierath JR, Kane S, Krook A, Lienhard GE, Wallberg-Henriksson H. Insulin-stimulated phosphorylation of the Akt substrate AS160 is impaired in skeletal muscle of type 2 diabetic subjects. *Diabetes.* 2005 Jun;54(6):1692–7.
56. Merjer RI, Eronga EC, Joak AM, Stehouwer CD, Wijnstok NJ, Houben AJ, et al. Microvascular Dysfunction: A Potential Mechanism in the Pathogenesis of Obesity-associated Insulin Resistance and Hypertension. *Microcirculation.* 2011;19(1):5–18.
57. Premilovac D, Bradley EA, Ng HLH, Richards SM, Rattigan S, Keske MA. Muscle insulin resistance resulting from impaired microvascular insulin sensitivity in Sprague Dawley rats. *Cardiovasc Res.* 2013;98(1):28–36.
58. Phillips BE, Atherton PJ, Varadhan K, Limb MC, Wilkinson DJ, Sjøberg KA, et al. The effects of resistance exercise training on macro- and micro-circulatory responses to feeding and skeletal muscle protein anabolism in older men. 2015;12:2721–34.
59. Liu J, Jahn LA, Fowler DE, Barrett EJ, Cao W, Liu Z. Free fatty acids induce insulin resistance in both cardiac and skeletal muscle microvasculature in humans. *J Clin Endocrinol Metab.* 2011 Feb;96(2):438–46.
60. Liu Z, Liu J, Jahn LA, Fowler DE, Barrett EJ. Infusing lipid raises plasma free fatty acids and induces insulin resistance in muscle microvasculature. *J Clin Endocrinol Metab.* 2009 Sep;94(9):3543–9.
61. Lang CH, Skrepnik N, Dobrescu C, Burns AH. Impairment of insulin action on peripheral glucose uptake and hepatic glucose production in tumor-bearing rats. *Am J Physiol Integr Comp Physiol.* 2017;265(2):R356–64.
62. Leij-Halfwerk S, Dagnelie PC, van Den Berg JW, Wattimena JD, Hordijk-Luijk CH, Wilson JP. Weight loss and elevated gluconeogenesis from alanine in lung cancer patients. *Am J Clin Nutr.* 2000 Feb;71(2):583–9.
63. Henriques FS, Sertié RAL, Franco FO, Knobl P, Neves RX, Andreotti S, et al. Early suppression of adipocyte lipid turnover induces immunometabolic modulation in cancer cachexia syndrome. *FASEB J.* 2017;31(5):1976–86.
64. Pehmøller C, Brandt N, Birk JB, Høeg LD, Sjøberg KA, Goodyear LJ, et al. Exercise alleviates lipid-induced insulin resistance in human skeletal muscle-signaling interaction at the level of TBC1 domain family member 4. *Diabetes.* 2012;61(11):2743–52.
65. Murray AJ, Panagia M, Hauton D, Gibbons GF, Clarke K. Plasma free fatty acids and peroxisome proliferator-activated receptor alpha in the control of myocardial uncoupling protein levels. *Diabetes.* 2005 Dec;54(12):3496–502.
66. Reaven GM, Chang H, Hoffman BB. Additive hypoglycemic effects of drugs that modify free-fatty acid metabolism by different mechanisms in rats with streptozocin-induced diabetes. *Diabetes.* 1988 Jan;37(1):28–32.
67. Spurway TD, Pogson CI, Sherratt HS, Agius L. Etomoxir, sodium 2-[6-(4-chlorophenoxy)hexyl] oxirane-2-carboxylate, inhibits triacylglycerol depletion in hepatocytes and lipolysis in adipocytes. *FEBS Lett.* 1997 Mar;404(1):111–4.
68. Divakaruni AS, Hsieh WY, Minarrieta L, Duong TN, Kim KKO, Desousa BR, et al. Etomoxir Inhibits Macrophage Polarization by Disrupting CoA Homeostasis. *Cell Metab.* 2018 Sep;28(3):490–503.e7.
69. Shriver LP, Manchester M. Inhibition of fatty acid metabolism ameliorates disease activity in an animal model of multiple sclerosis. *Sci Rep [Internet].* 2011;1:79. Available from: <http://www.ncbi.nlm.nih.gov/pmc/articles/PMC3216566/pdf/srep00079.pdf>

Fig. 1

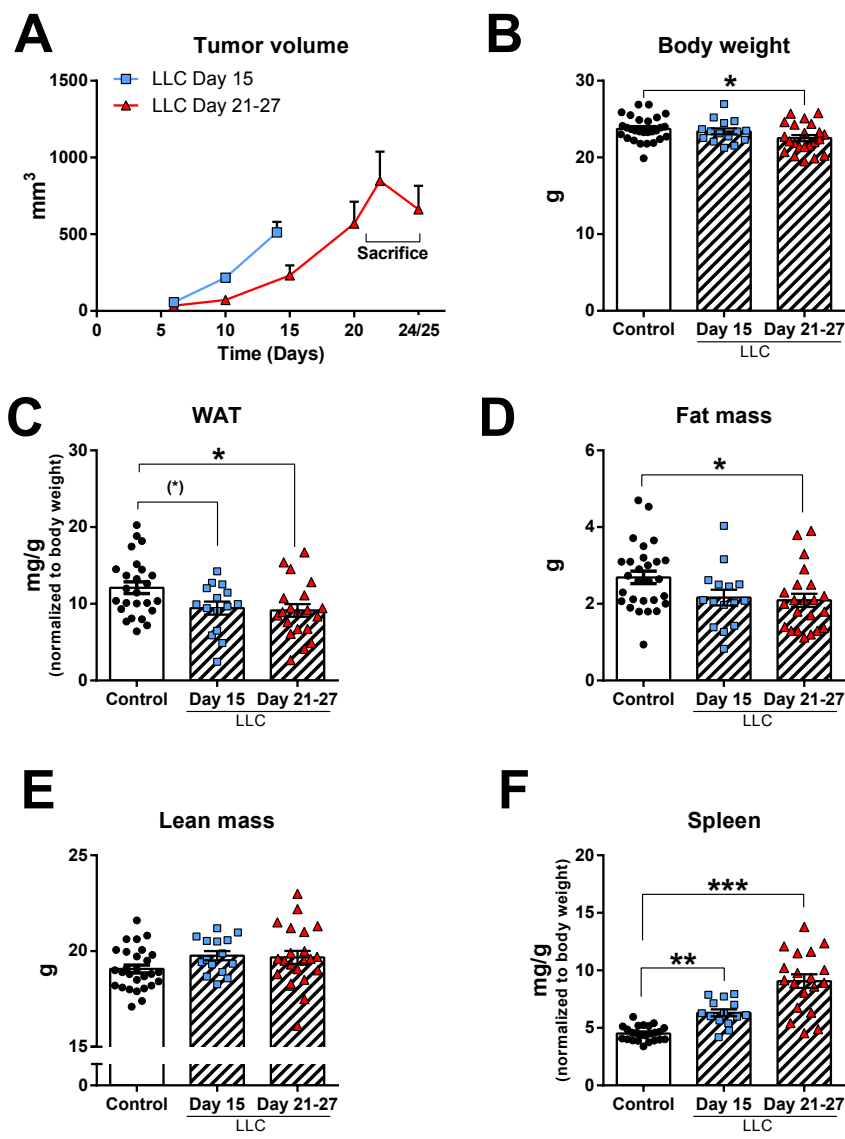



**Fig. 2**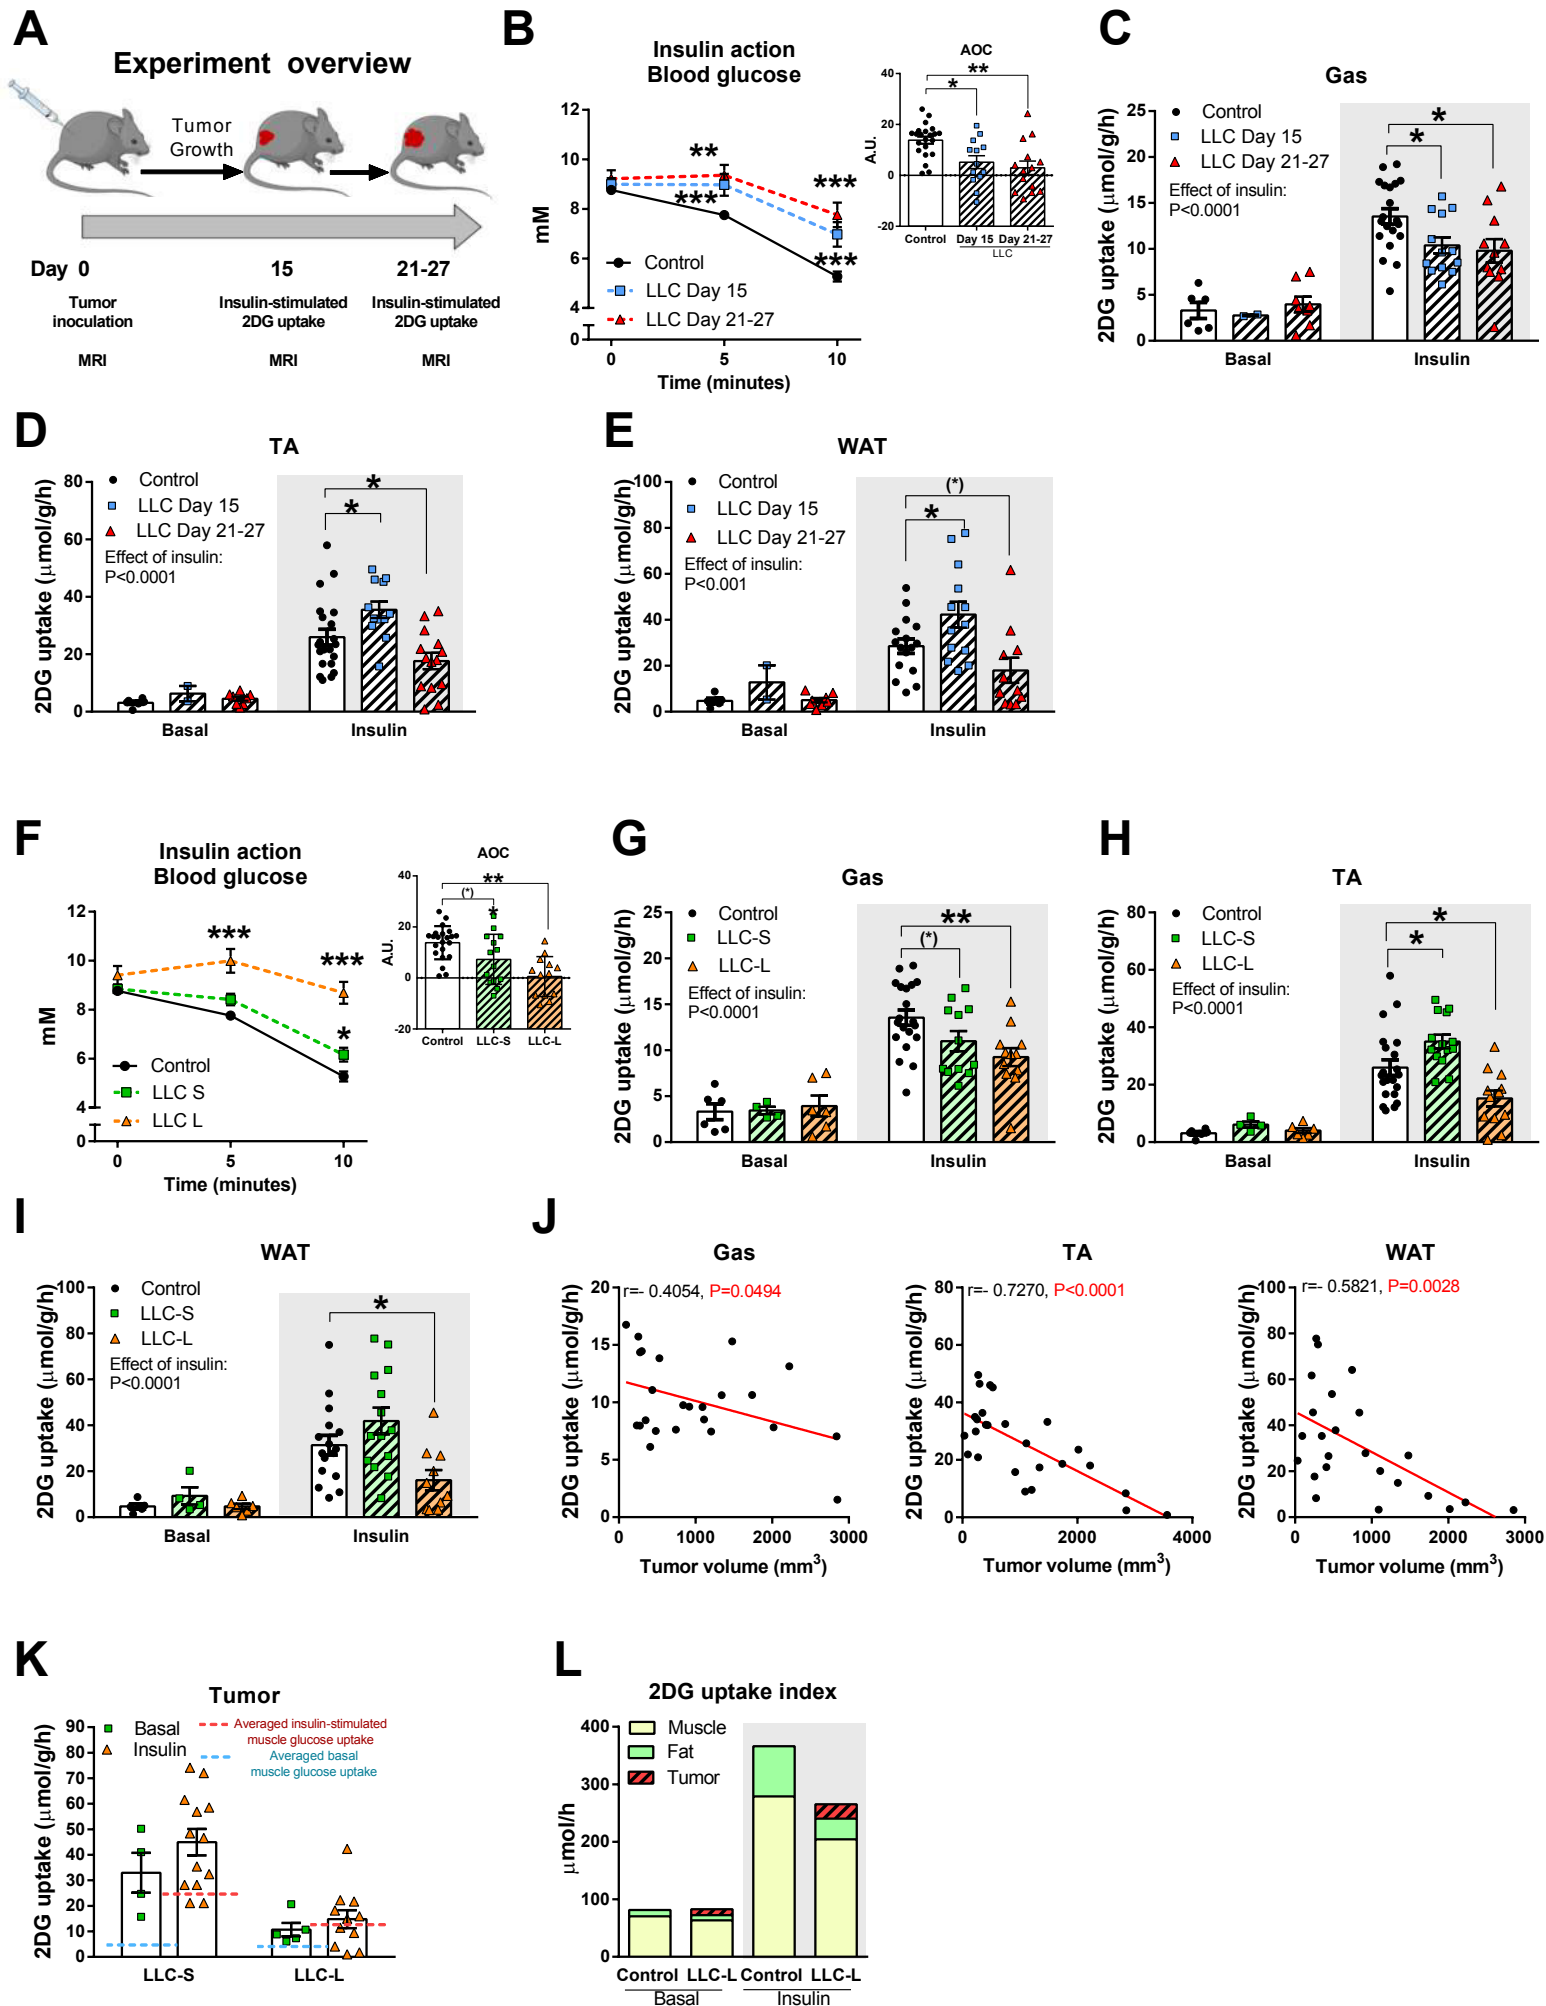



Fig. 3

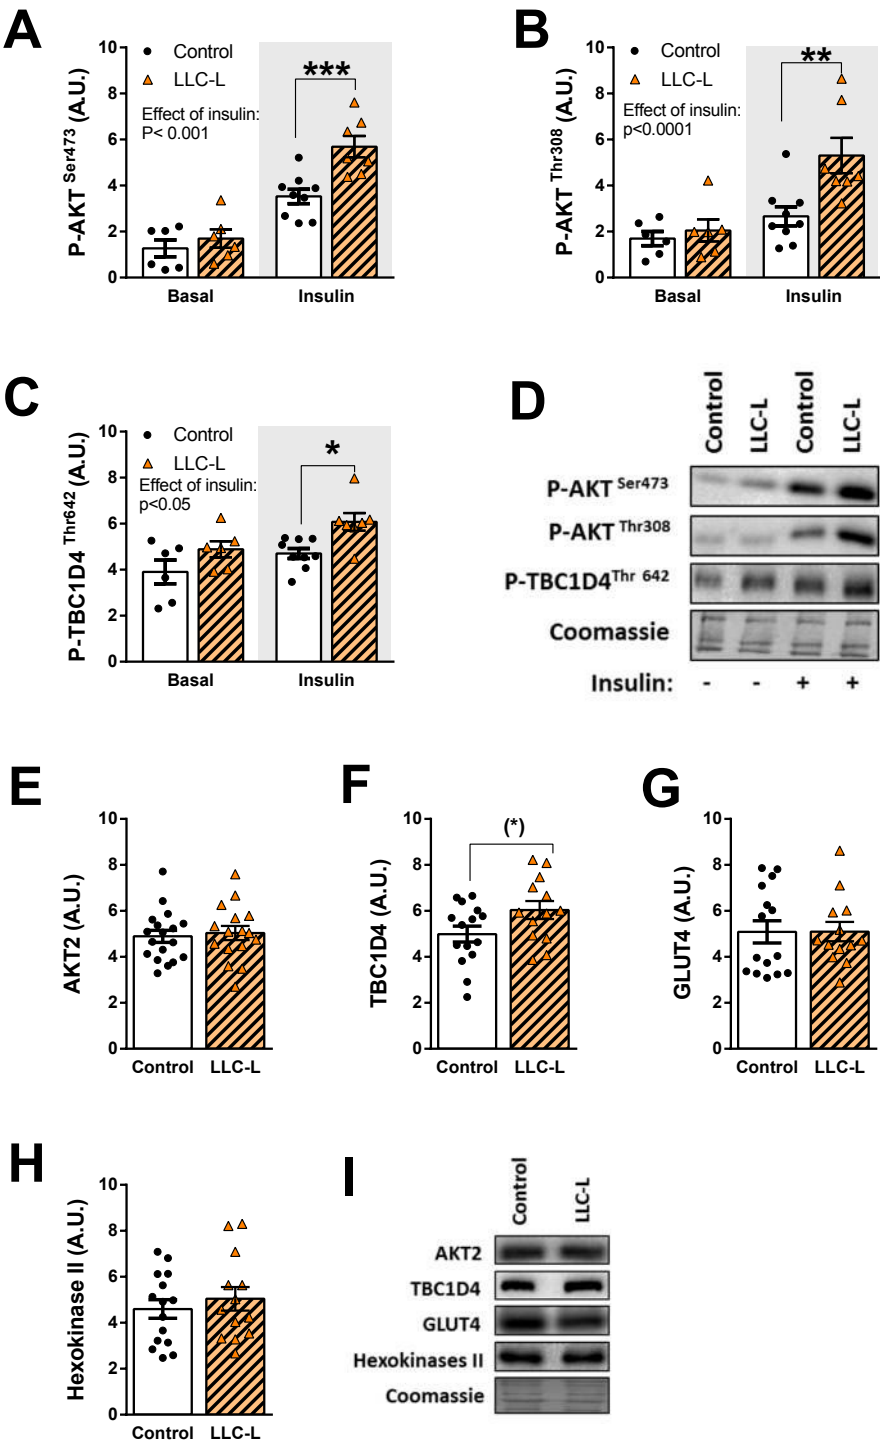

Fig. 4

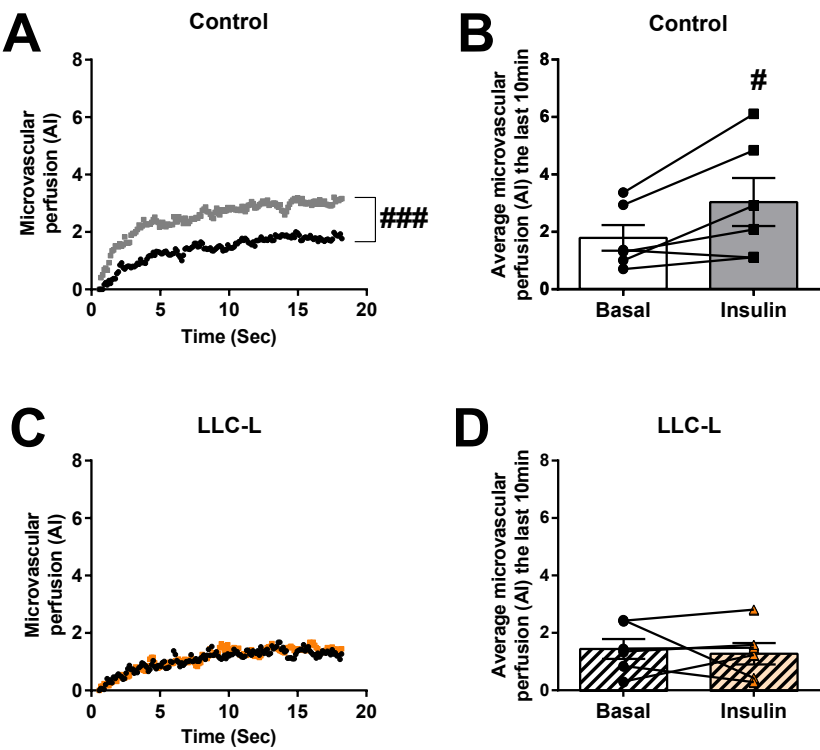

**Fig. 5**

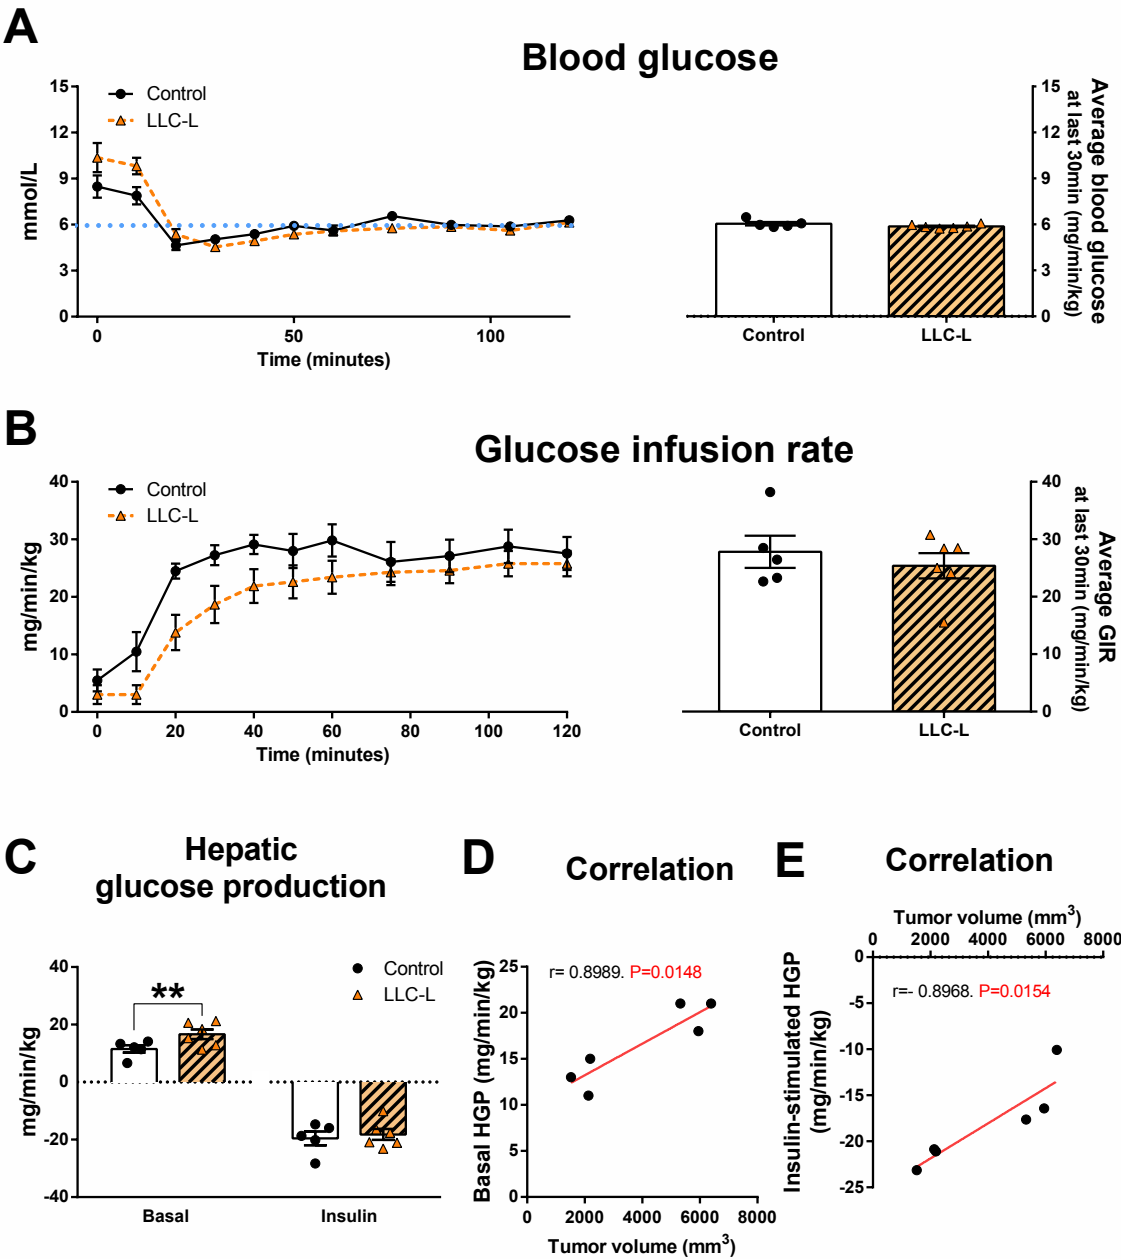

**Fig. 6**

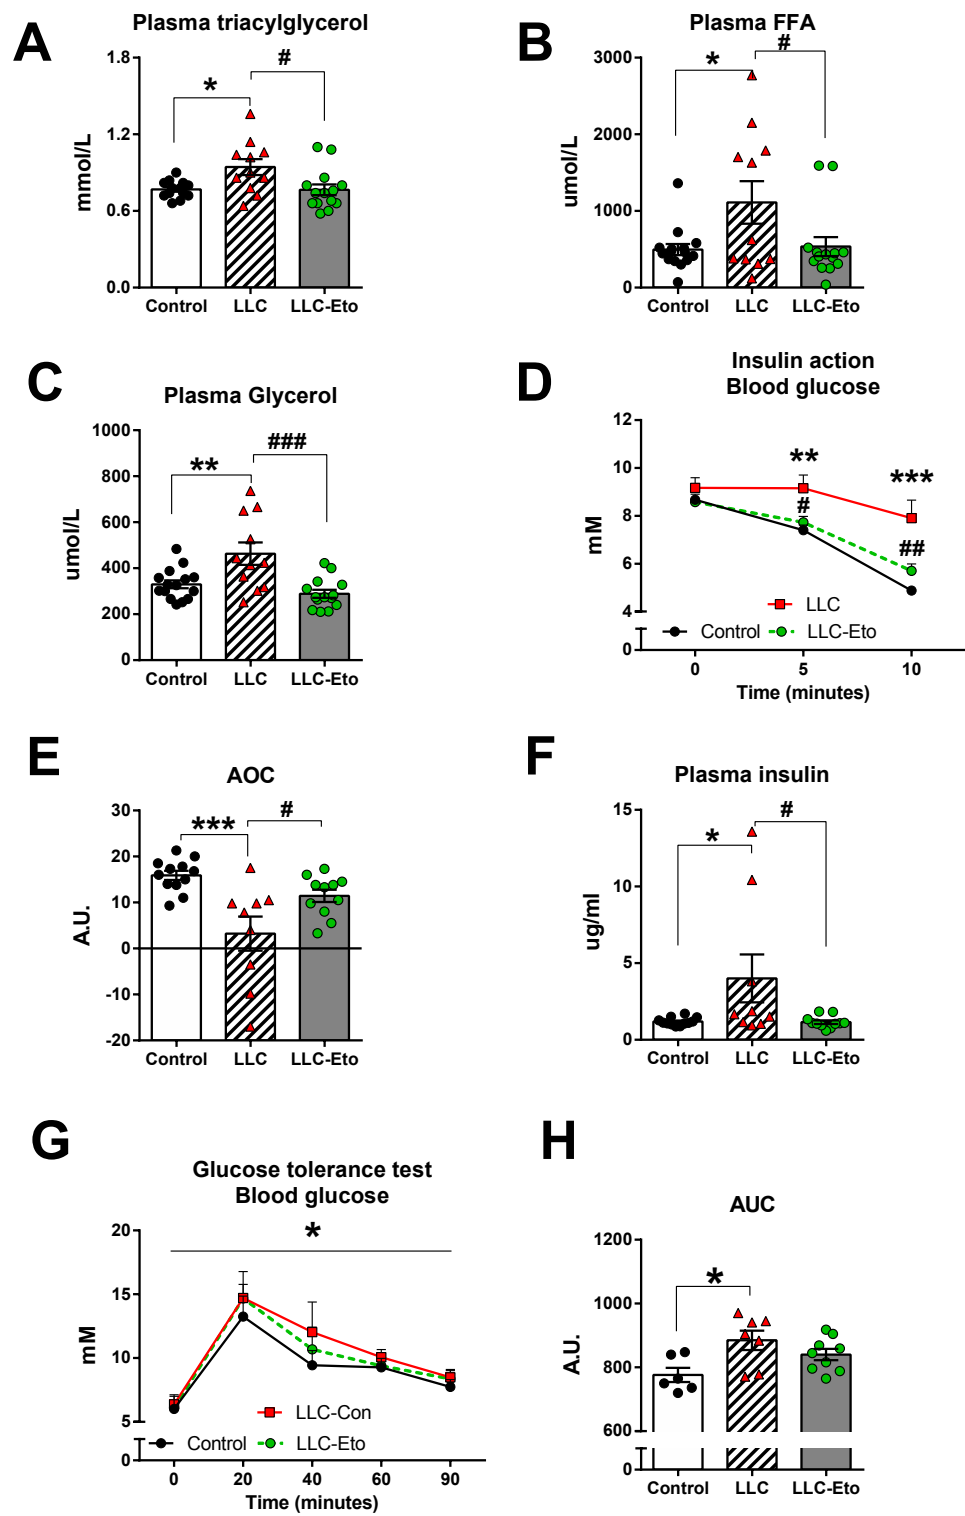

Fig. 7

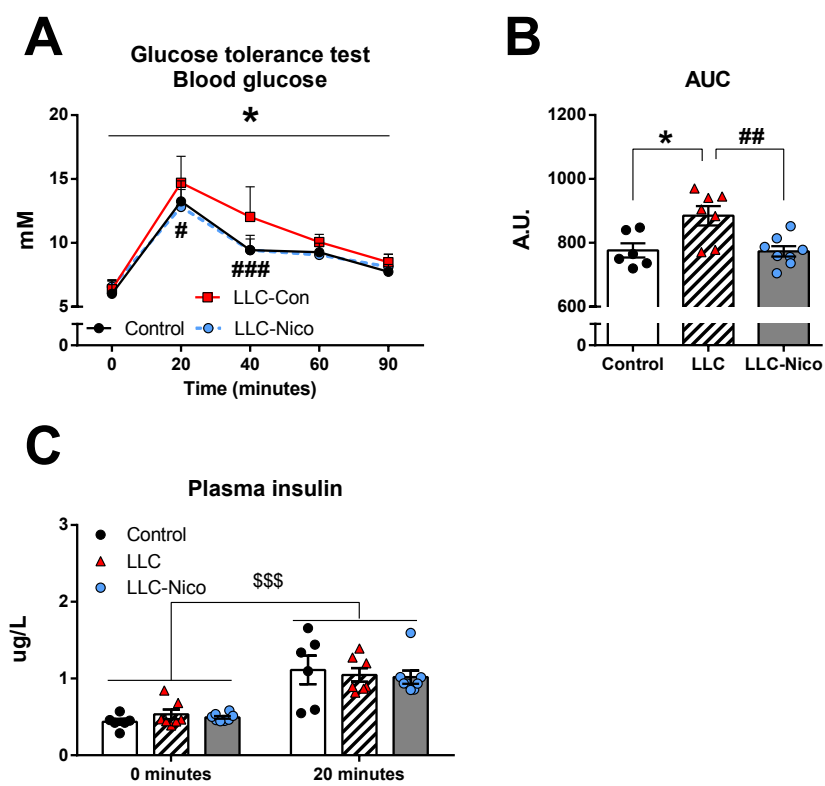

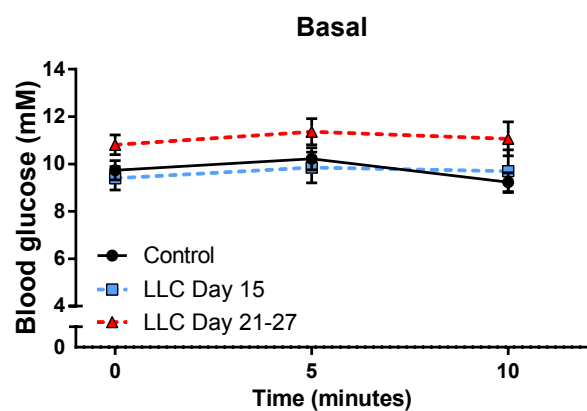

Fig. S2

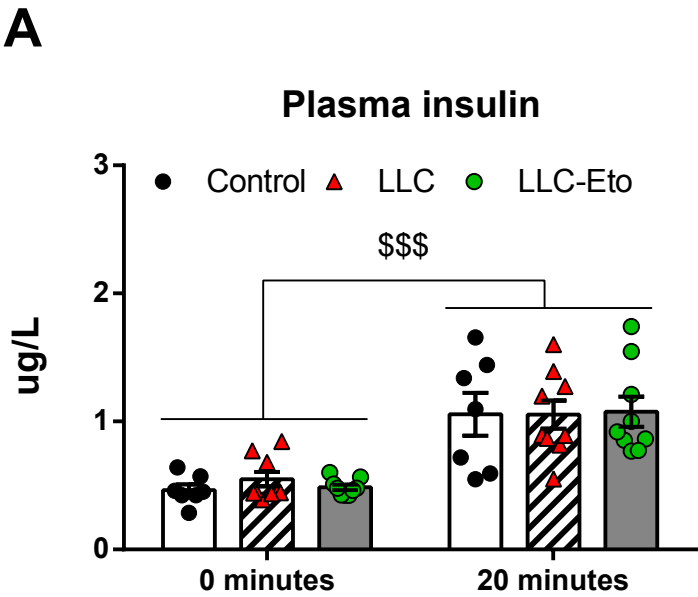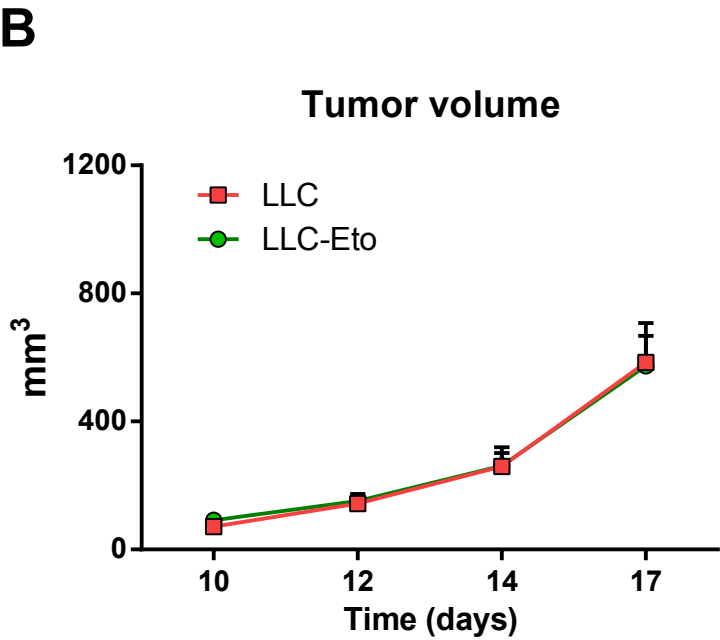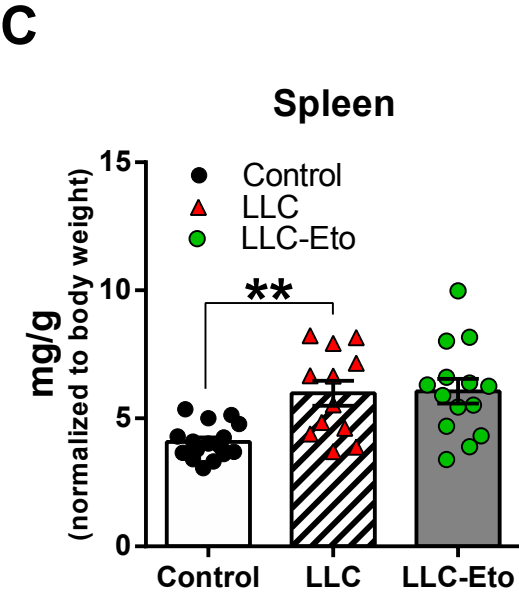

Fig. S3

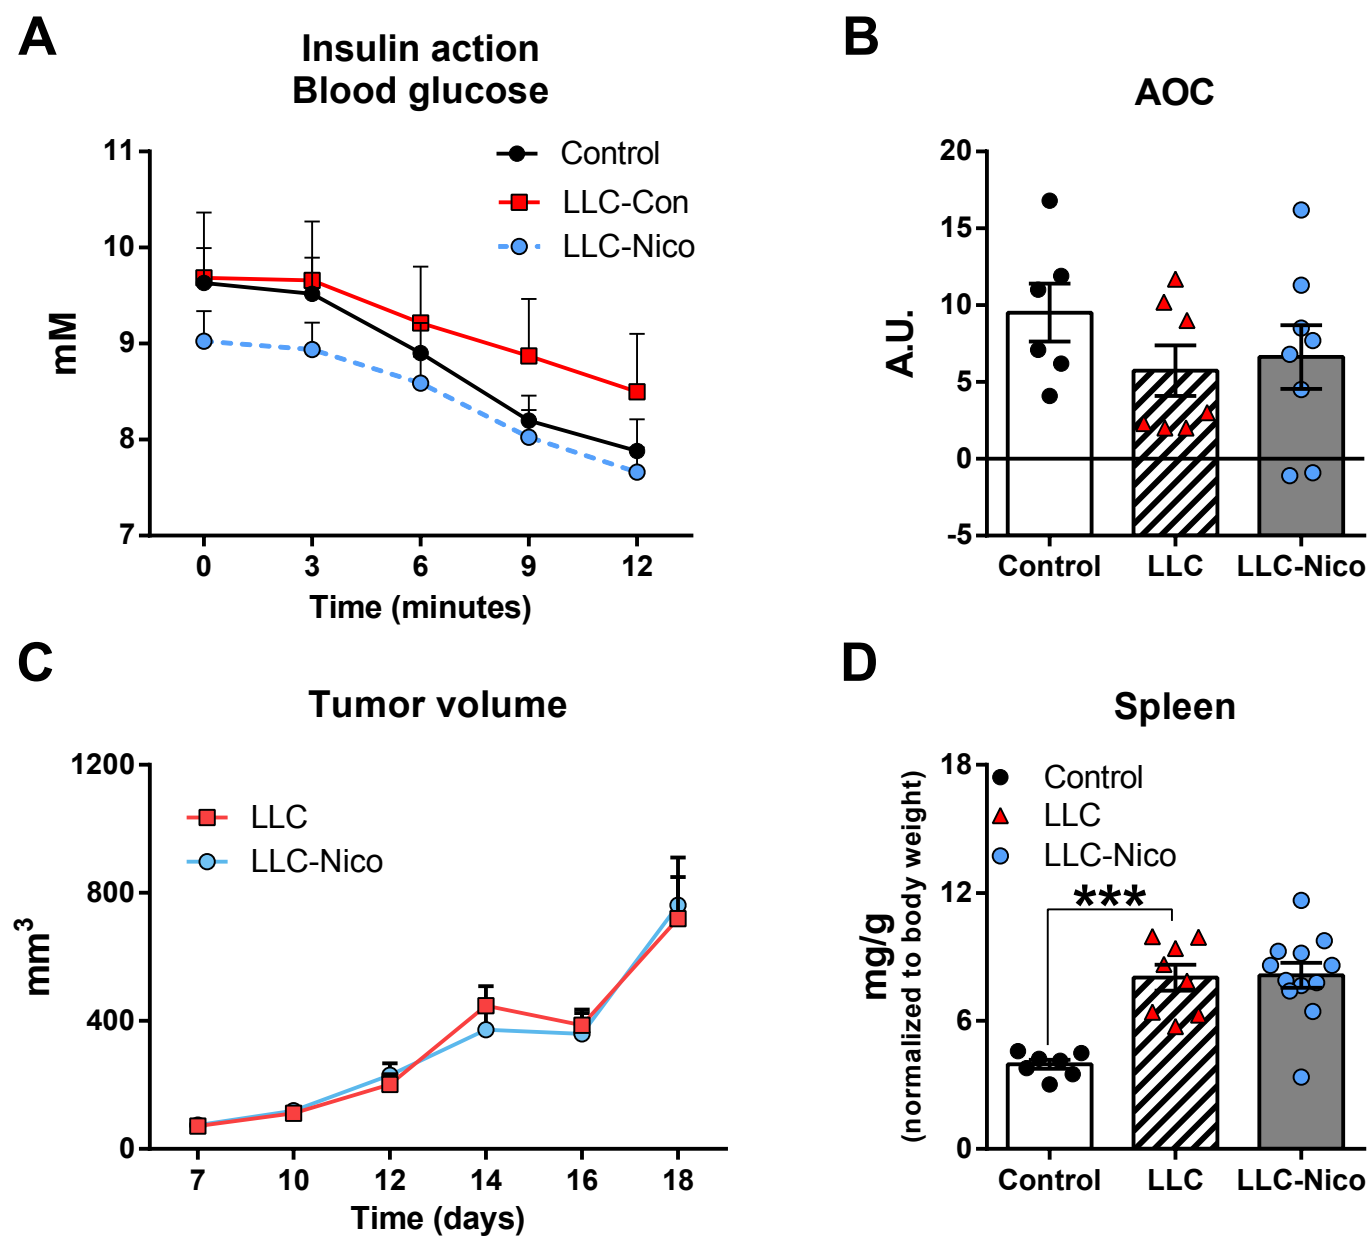



**Figure 1.** Characteristics of Lewis lung carcinoma (LLC) tumor-bearing mice. **A)** Tumor volume, **B)** body weight, **C)** perigonadal white adipose tissue (WAT) weight, **D)** fat mass, **E)** lean mass and **F)** spleen weight in control mice (n=25-28) and LLC tumor-bearing mice following 15 (n=14-15) or 21-27 days (n=19-22) tumor inoculation. The weights of all tissues were normalized to body weight with tumor weight subtracted. Statistically significant effect of LLC on body composition or tissue weights is indicated by (\*)P<0.1; \*P < 0.05; \*\*P < 0.01; \*\*\*P < 0.001. Values are shown as mean± SE with or without individual values.

**Figure 2.** Insulin sensitivity in Lewis lung carcinoma (LLC) tumor-bearing mice. **A)** Experiment overview **B)** Blood glucose levels measured before (0 minutes), 5 minutes, and 10 minutes following retro-orbital (r.o.) insulin injection (0.3U kg<sup>-1</sup> body weight) and area over the curve (AOC) (n=13-22) during the 10 minutes insulin stimulation. **C)** Basal (n=2-8) and insulin- (n=11-20) stimulated 2-deoxy-glucose (2DG) uptake in gastrocnemius (Gas) muscle, **D)** tibialis anterior (TA) muscle, and **E)** perigonadal white adipose tissue (WAT) in control mice or LLC tumor-bearing mice following 15 days or 21-27 days tumor inoculation.

Data were re-divided into mice with large tumor volumen (>800 mm<sup>3</sup>; LLC-L) and small tumors (<800 mm<sup>3</sup>; LLC -S). **F)** Blood glucose levels measured before (0 minutes), 5 minutes, and 10 minutes following r.o. insulin injection (0.3U kg<sup>-1</sup> body weight) and AOC (n=13-22) during the 10 minutes' insulin stimulation. **G)** Basal (n=4/6) and insulin (n=10-21) stimulated 2DG uptake in Gas, **H)** TA, and **I)** WAT. **J)** Correlation between tumor volume and insulin-stimulated 2DG uptake in Gas, TA and WAT (n=24-26). **K)** Basal (n=4-5) and insulin- (n=12-14) stimulated glucose uptake in the tumor. **L)** Index of the contribution of muscle, fat, and tumor tissue to whole-body glucose uptake. Statistically significant effect of LLC on whole-body insulin action at each timepoint and 2DG uptake is indicated by (\*)P<0.1; \*P < 0.05; \*\*P < 0.01; \*\*\*P < 0.001. Values are shown as mean± SE with or without individual values.

**Figure 3.** Effect of Lewis lung carcinoma on insulin-stimulated signaling in gastrocnemius muscle of mice with large tumors ( $>800\text{mm}^3$ ; LLC-L). **A)** Basal (n=6) and insulin- (n=10-12) stimulated phosphorylated (P)-AKT<sup>Ser473</sup>, **B)** P-AKT<sup>Thr308</sup>, **C)** P-TBC1D4<sup>Thr642</sup>. **D)** Representative phosphoblots. **E)** Protein expression of AKT2, **F)** TBC1D4, **G)** GLUT4, and **H)** Hexokinases II (n=16-18). **I)** Representative blots of total proteins. Statistically significant effect of LLC-L on insulin signaling is indicated by (\*) $P < 0.1$ ; \* $P < 0.05$ ; \*\* $P < 0.01$ ; \*\*\* $P < 0.001$ . Values are shown as individual values with mean  $\pm$  SE.

**Figure 4.** Effect of Lewis lung carcinoma on skeletal muscle microvascular perfusion in mice with large tumors ( $>800\text{mm}^3$ ; LLC-L). **A)** Microvascular refilling curves after microbubbles destruction **B)** microvascular perfusion presented as the plateau AI value in adductor magnus and semimembranosus muscles in control (**A** and **B**) and LLC-L (**C** and **D**) tumor-bearing mice at baseline and after 60 minutes of insulin ( $7.5 \mu\text{U} / \text{kg}/\text{minute}$ ) infusion. (n=6) in each group. Statistically significant effect of insulin on microvascular perfusion is indicated by #/#### $P < 0.05/0.001$ . Values are shown as mean or individual values with mean  $\pm$  SE.

**Figure 5.** Effect of Lewis lung carcinoma (LLC) on hepatic glucose production (HGP) in mice with large tumors ( $>800\text{mm}^3$ ; LLC-L). **A)** Blood glucose, **B)** glucose infusion rate (GIR), **C)** basal or insulin-stimulated HGP in control mice (n=5) and LLC-L tumor-bearing mice (n=6), **D)** correlation between tumor volume and basal or **E)** insulin-stimulated HGP during hyperinsulinemic-euglycemic clamp ( $7.5 \mu\text{U} / \text{kg}/\text{minute}$ ). Statistically significant effect of LLC-L on basal HGP is indicated by \*\* $P < 0.01$ . Values are shown as mean  $\pm$  SE with or without individual values.

**Figure 6.** Effect of etomoxir in Lewis lung carcinoma (LLC) tumor-bearing mice. **A)** Plasma triacylglycerol, **B)** free fatty acid (FFA), and **C)** glycerol in control mice and LLC tumor-bearing mice with or without etomoxir (Eto) administration (n=11-15). **D)** Blood glucose levels before (0

minutes), 5 minutes and 10 minutes following retro-orbital insulin injection (0.3U kg<sup>-1</sup> body weight), **E**) Area over the curve (AOC). **F**) Plasma insulin (n=9-12). **G**) Blood glucose levels before (0 minutes), 20 minutes, 40 minutes, 60 minutes and 90 minutes following intraperitoneal glucose tolerance test (GTT; 2 g kg<sup>-1</sup> body weight). **H**) Area under the curve (AUC) (n=6-9). Statistically significant effect of LLC is indicated by \*P < 0.05, \*\*P < 0.01, \*\*\*P < 0.001; statistically significant effect of Eto is indicated by #P < 0.05, ##P < 0.01, ###P < 0.001. Values are shown as mean± SE with or without individual values.

**Figure 7.** Effect of nicotinic acid in Lewis lung carcinoma (LLC) tumor-bearing mice. **A**) Blood glucose levels before (0 minutes), 20 minutes, 40 minutes, 60 minutes and 90 minutes following intraperitoneal glucose tolerance test (GTT; 2 g kg<sup>-1</sup> body weight) in control and LLC tumor-bearing mice with or without nicotinic acid (Nico) administration. **B**) Area under the curve (AUC). **C**) plasma insulin levels at 0 minutes and 20 minutes into the GTT (n=6-8). Statistically significant effect of LLC is indicated by \*P < 0.05; statistically significant effect of Nico in tumor-bearing mice is indicated by #P < 0.05, ##P < 0.01, ###P < 0.001. Statistically significant effect of glucose injection on plasma insulin is indicated by \$\$\$P < 0.001. Values are shown as mean± SE with or without individual values.

**Figure supplementary 1.** Blood glucose levels measured before (0 minutes), 5 minutes, and 10 minutes following retro-orbital saline injection in control or Lewis lung carcinoma (LLC) tumor-bearing mice following 15 days or 21-27 days tumor inoculation. Values are shown as mean± SE.

**Figure supplementary 2.** **A**) Plasma insulin levels at 0 minutes and 20 minutes following intraperitoneal glucose tolerance test (GTT; 2 g kg<sup>-1</sup> body weight) in control mice or Lewis lung carcinoma (LLC) tumor-bearing mice with or without etomoxir (Eto) administration (n=6-9). **B**) Tumor volume and **C**) Spleen weight in control or LLC tumor-bearing mice with Eto administration

(n=11-14). Statistically significant effect of glucose injection on plasma insulin is indicated by \$\$\$P < 0.001. Values are shown as mean  $\pm$ SE with or without individual values.

**Figure supplementary 3.** **A)** Blood glucose levels before (0 minutes), 5 minutes and 10 minutes following retro-orbital insulin injection (0.3U kg<sup>-1</sup> body weight) in control mice or Lewis lung carcinoma (LLC) tumor-bearing mice with or without nicotinic acid (Nico) administration (n=8-12). **B)** Area over the curve (AOC). **C)** Tumor volume and **D)** spleen weight in control or LLC tumor-bearing mice with Nico administration (n=8-12). Values are shown as mean  $\pm$ SE with or without individual values.
